# Supplementary material for: Constituents of Psoralea corylifolia Fruits and Their Effects on Methicillin-Resistant Staphylococcus aureus
Source: PubMed Central journal article supplement (PMC6332258; doi:10.3390/molecules200712500), 2015-07-09
Supplement: molecules-20-12500-s001.pdf [file molecules-20-12500-s001.pdf]

## Supplementary Materials

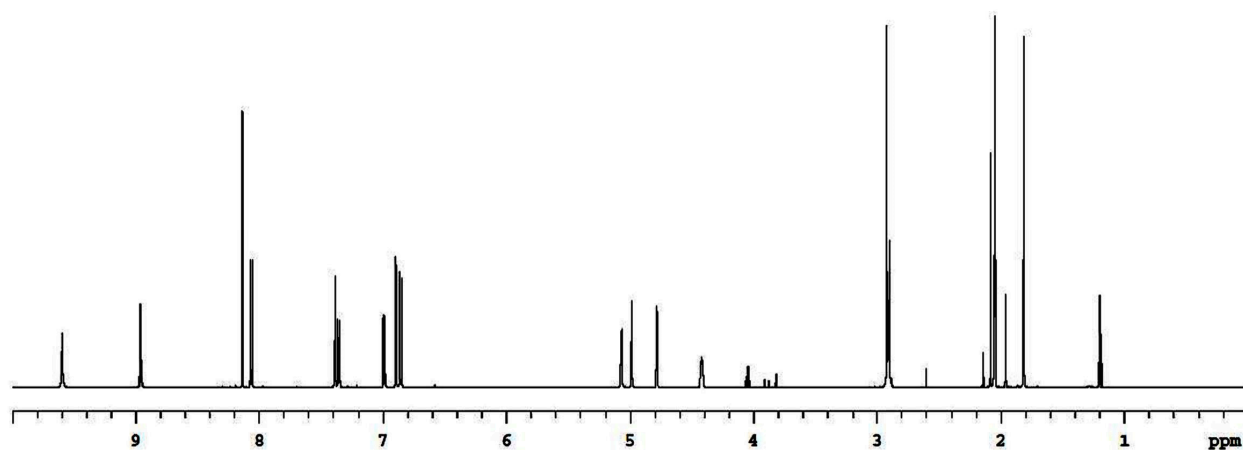

**Figure S1.**  $^1\text{H}$ -NMR spectrum of compound **1** (acetone- $d_6$ , 600 MHz).

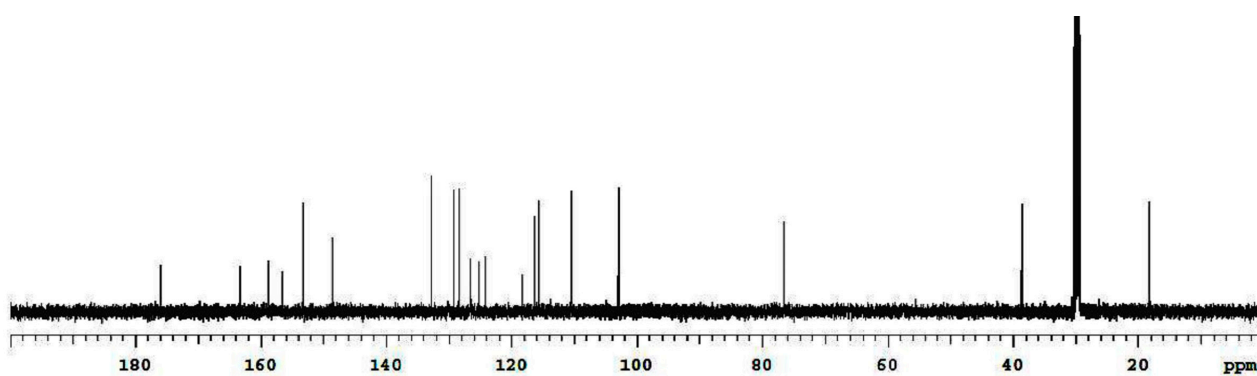

**Figure S2.**  $^{13}\text{C}$ -NMR spectrum of compound **1** (acetone- $d_6$ , 151 MHz).

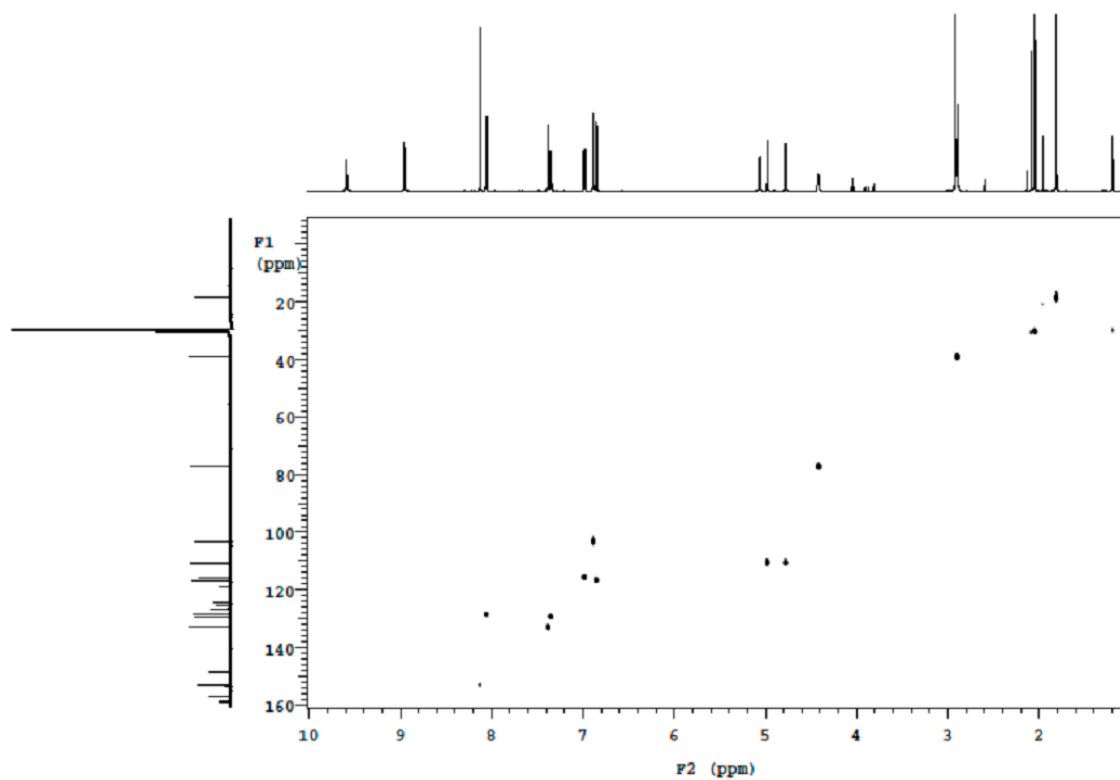

**Figure S3.** HSQC spectrum of compound **1**.

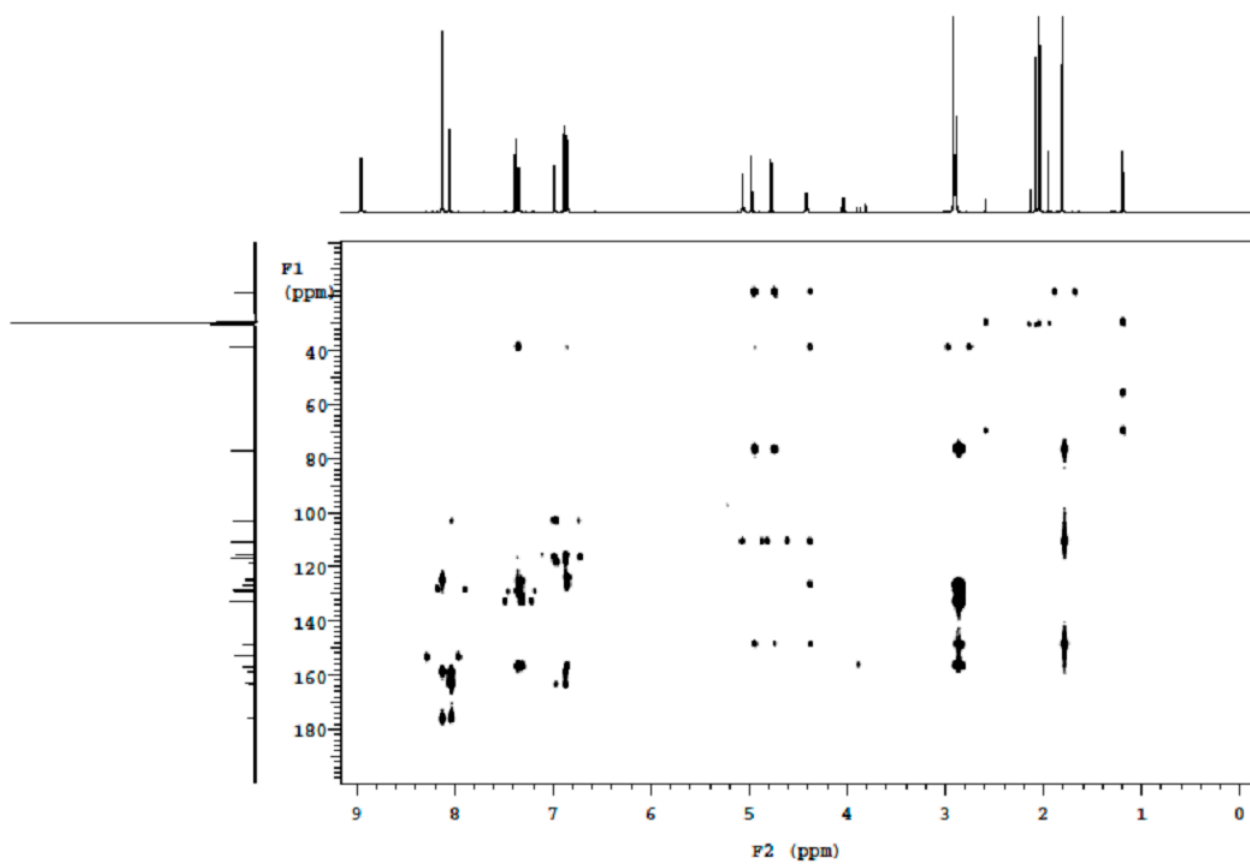

Figure S4. HMBC spectrum of compound 1.

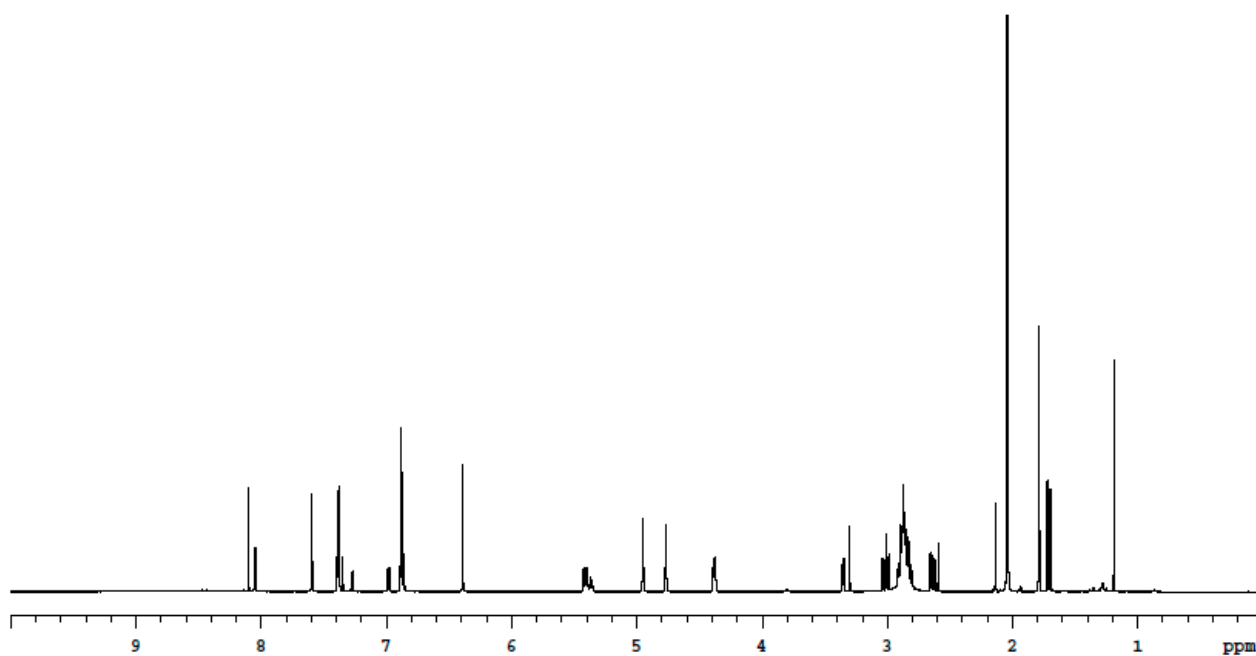

Figure S5.  $^1\text{H}$ -NMR spectrum of compound 2 (acetone- $d_6$ , 600 MHz).

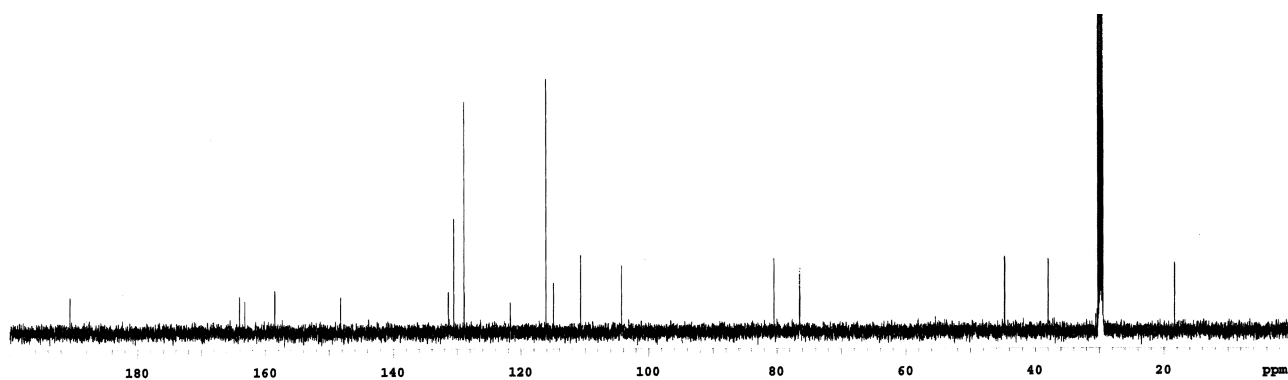

Figure S6.  $^{13}\text{C}$ -NMR spectrum of compound 2 (acetone- $d_6$ , 151 MHz).

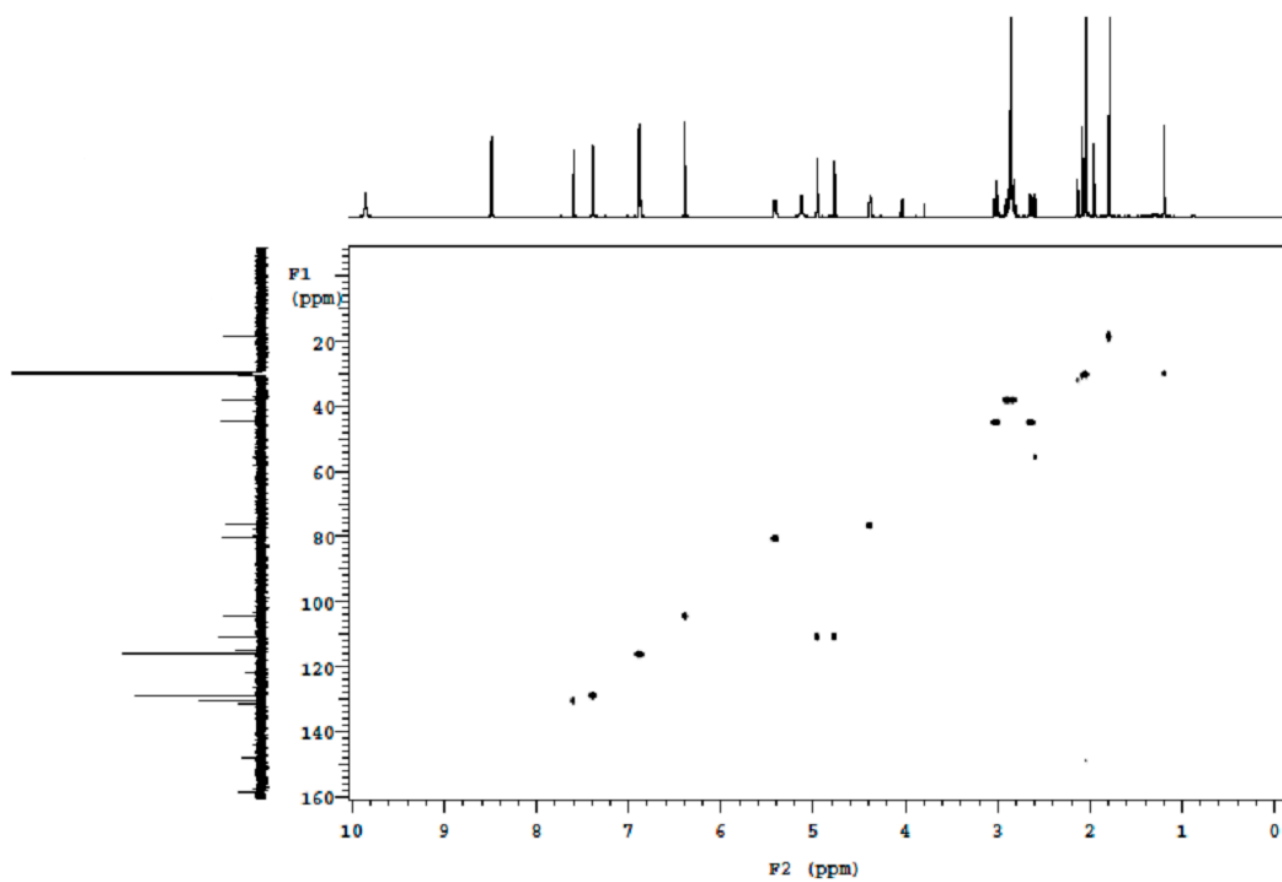

Figure S7. HSQC spectrum of compound 2.

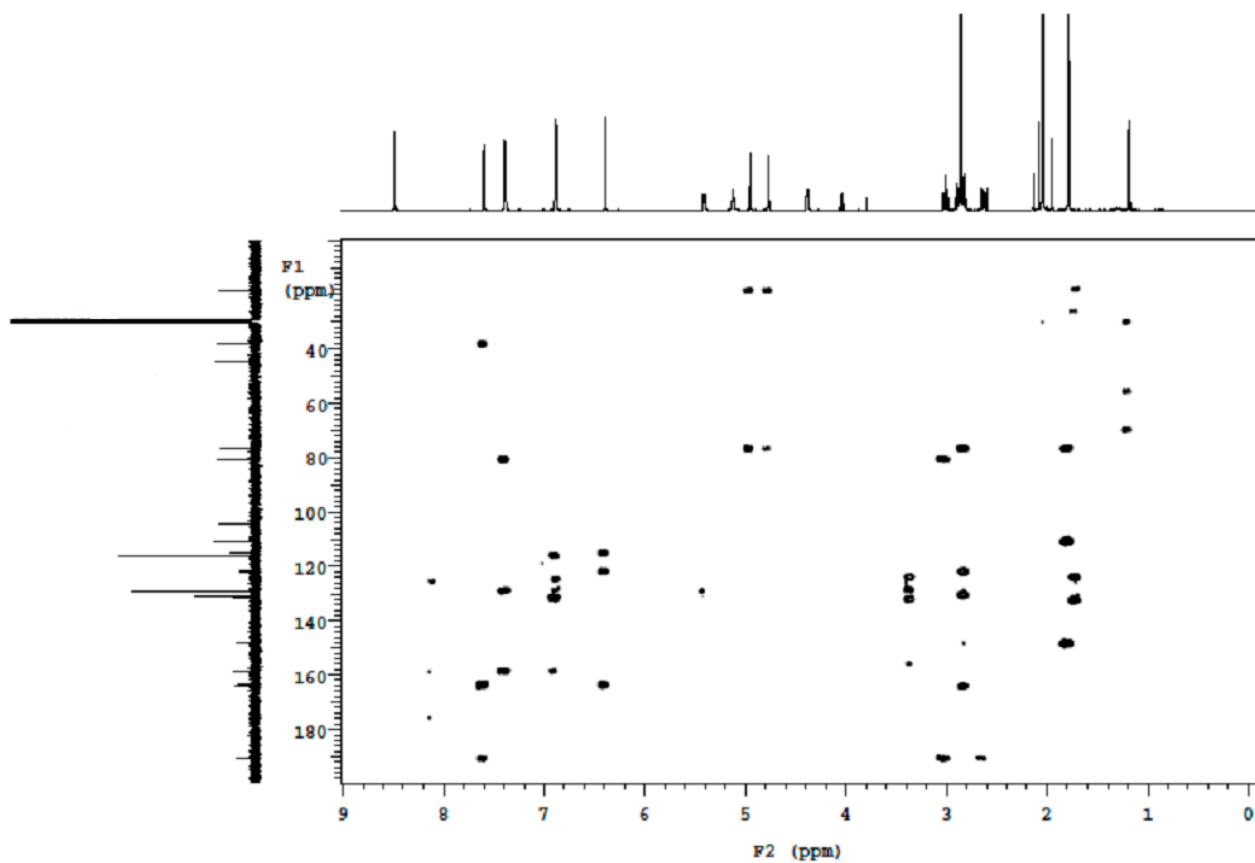

Figure S8. HMBC spectrum of compound 2.
